# Supplementary material
Source: Springer Nature journal article supplement (https://www.springermedizin.de/resource/supplementary/13063_2010_516_MOESM2_ESM.pdf/9618144)
Supplement: MOESM2 [file 9618144]

| total N randomised | N for primary analysis | power for 60% vs. 73% (OR = 1.80) <sup>1</sup> | power for 20% vs. 33% (OR=1.97) <sup>2</sup> | detectable difference with 80% power <sup>3</sup> | power to detect 3 BDI point difference |
|--------------------|------------------------|------------------------------------------------|----------------------------------------------|---------------------------------------------------|----------------------------------------|
| 360                | 306                    | 63%                                            | 69%                                          | 15%                                               | 82%                                    |

<sup>1</sup> based on original sample size

<sup>2</sup> revised calculation based on data from the IPCRESS study<sup>24</sup>

<sup>3</sup> percentage difference of intervention group from usual care group assuming 20% recovery in usual care group

**Figure 2**  
Sample size calculation
